# Supplementary material for: Evolution of p53 pathway-related genes provides insights into anticancer mechanisms of natural longevity in cetaceans
Source: Research Square preprint supplement (doi:10.21203/rs.3.rs-1727364/v1), 2022-06-15
Supplement: Supplementary file 1 [file 0c37e348101f1ac0f603a080.xlsx]

## Sheet: 17 cetacean
Species	Common name	Genome Version	Scaffold N50	Longevity/year	Adult body mass/g	Longevity Quotient
Balaena mysticetus	Bowed whale	http://www.bowhead-whale.org/about/	877000	211	100000000	1.90721
Balaenoptera acutorostrata	Common minke whale	GCA_000493695.1	12843668	50	7500000	0.728395
Balaenoptera musculus	Blue whale	GCA_009873245.3	110314666	110	136000000	0.939515
Delphinapterus leucas	Beluga whale	GCA_002288925.3	31183418	40	1430000	0.790811
Globicephala melas	Long-finned pilot whale	GCA_006547405.1	18102937	60	1060000	1.25
Lagenorhynchus obliquidens	Pacific white-sided dolphin	GCA_003676395.1	28371583	46	103000	1.47668
Lipotes vexillifer	Baiji	GCA_000442215.1	2419148	24	83500	0.800821
Megaptera novaeangliae	Humpback whale	GCA_004329385.1	9138802	95	30000000	1.07198
Monodon monoceros	Narwhal	GCA_005190385.2	107566389	50	1250000	1.01332
Neophocaena asiaeorientalis	Yangtze finless porpoise	GCA_003031525.2	6341296	25	30000	1.00735
Orcinus orca	Killer whale	GCA_000331955.2	12735091	90	3987500	1.47297
Phocoena phocoena	Harbor porpoise	GCA_003071005.2	28296388	20.4	52500	0.741459
Phocoena sinus	Vaquita	GCA_008692025.1	115469292	21	44061	0.788314
Physeter catodon	Sperm whale	GCA_002837175.2	122182240	77	28500000	0.877117
Sousa chinensis	Indo-Pacific humpbacked dolphin	GCA_007760645.1	19436979	40	280000	1.06798
Tursiops aduncus	Indo-Pacific bottlenose dolphin	GCA_003227395.1	1235788	53	230000	1.4673
Tursiops truncatus	Bottlenosed dolphin	GCA_011762595.1	108430135	51.6	200000	1.46581

## Sheet: 65 cetacean
Species	Common name	Longevity/year	Reference	Adult body mass/g	Reference	LQ
Balaena mysticetus	Bowhead whale	211	AnAge; Amniote;	100000000	AnAge	1.90936
Balaenoptera acutorostrata	Common minke whale	50	AnAge; Amniote; ;	7500000	AnAge; Amniote	0.729103
Balaenoptera bonaerensis	Antarctic minke whale	73	Amniote	7500000	Amniote	1.06449
Balaenoptera borealis	Sei whale	74	AnAge; Amniote;	20000000	AnAge; Amniote	0.900714
Balaenoptera edeni	Bryde's whale	72	AnAge; Amniote;	16000000	AnAge	0.913142
Balaenoptera musculus	Blue whale	110	AnAge; Amniote; ;	136000000	AnAge	0.940589
Balaenoptera physalus	Fin whale	114	AnAge; Amniote; ;	70000000	AnAge	1.10165
Berardius arnuxii	Arnoux's beaked whale	84	Amniote;	7000000	Amniote;	1.24056
Berardius bairdii	Baird's beaked whale	84	AnAge; Amniote ;	11380000	AnAge;	1.13434
Cephalorhynchus commersonii	Commerson's dolphin	25.8	Amniote;	68700	Amniote	0.893012
Cephalorhynchus hectori	Hector's dolphin	20	Amniote; ;	50000	Amniote;	0.733981
Delphinapterus leucas	Beluga whale	40	AnAge; Amniote; ;	1430000	AnAge	0.791502
Delphinus delphis	Short-beaked common dolphin	29.025	Amniote;	77818.3	Amniote	0.981838
Eschrichtius robustus	Gray whale	77	AnAge; Amniote; ;	28500000	AnAge	0.878038
Eubalaena australis	Southern right whale	70	AnAge; Amniote	45000000	AnAge	0.733806
Eubalaena glacialis	North Atlantic right whale	67	AnAge; Amniote;	23000000	AnAge; Amniote;	0.794785
Eubalaena japonica	North Pacific right whale	67	Amniote;	23000000	Amniote;	0.794785
Feresa attenuata	Pygmy killer whale	21	Amniote	151500	Amniote	0.628336
Globicephala macrorhynchus	Short-finned pilot whale	63	AnAge; Amniote; ;	2200000	AnAge	1.15152
Globicephala melas	Long-finned pilot whale	60	AnAge; Amniote;	1060000	AnAge; Amniote	1.25457
Grampus griseus	Risso's dolphin	42.5	AnAge; Amniote;	425000	AnAge; Amniote	1.05159
Hyperoodon ampullatus	Northern bottlenose whale	37	AnAge; Amniote; ;	6500000	AnAge	0.553947
Hyperoodon planifrons	Southern bottlenose Whale	37	Amniote	5440000	Amniote	0.572413
Inia geoffrensis	Amazon dolphin	31.3	AnAge; Amniote;	84000	AnAge	1.04399
Kogia breviceps	Pygmy sperm whale	17	AnAge; Amniote; ;	424600	AnAge; Amniote;	0.420707
Kogia sima	Dwarf sperm whale	22	Jefferson, T. A., Webber, M. A., & Pitman, R. L. (2011). Marine mammals of the world: a comprehensive guide to their identification. Elsevier.	186650	Amniote;	0.633438
Lagenodelphis hosei	Fraser's dolphin	16	Amniote;	164000	Amniote;	0.471792
Lagenorhynchus acutus	Atlantic white-sided dolphin	27	AnAge; Amniote; ;	208000	AnAge;	0.762046
Lagenorhynchus albirostris	White-beaked dolphin	13	Amniote	183317	Amniote;	0.375549
Lagenorhynchus australis	Peale's dolphin	13	Amniote	180000	Amniote	0.376814
Lagenorhynchus cruciger	Hourglass dolphin	46	Amniote	72400	Amniote	1.57688
Lagenorhynchus obliquidens	Pacific white-sided dolphin	46	AnAge; Amniote	103000	AnAge; Amniote;	1.47774
Lagenorhynchus obscurus	Dusky dolphin	36	Amniote	80000	Amniote	1.2116
Lipotes vexillifer	Baiji	24	AnAge; Amniote;	83500	AnAge; Amniote	0.801385
Lissodelphis borealis	Northern right whale dolphins	42	Amniote;	113000	Amniote;	1.32641
Megaptera novaeangliae	Humpback whale	95	AnAge; Amniote;	30000000	AnAge; Amniote;	1.07311
Mesoplodon densirostris	Blainville's beaked whale	27	Amniote;	1070000	Amniote;	0.563581
Mesoplodon europaeus	Gervais's beaked whale	48	AnAge; Amniote;	5600000	AnAge; Amniote;	0.738635
Mesoplodon hectori	Hector's beaked whale	30	Amniote	900000	Amniote	0.646479
Mesoplodon stejnegeri	Stejneger's beaked whale	35	Jefferson, T. A., Webber, M. A., & Pitman, R. L. (2011). Marine mammals of the world: a comprehensive guide to their identification. Elsevier.	1930000	Amniote	0.65535
Monodon monoceros	Narwhal	50	AnAge; Amniote;	1250000	AnAge;	1.0142
Neophocaena phocaenoides	Finless porpoise	33	AnAge; Amniote;	32500	AnAge; Amniote;	1.31108
Orcaella brevirostris	Irrawaddy dolphin	30	AnAge; Amniote;	190000	AnAge; Amniote;	0.860954
Orcaella heinsohni	Australian snubfin dolphin	30	Jefferson, T. A., Webber, M. A., & Pitman, R. L. (2011). Marine mammals of the world: a comprehensive guide to their identification. Elsevier.	160000	Jefferson, T. A., Webber, M. A., & Pitman, R. L. (2011). Marine mammals of the world: a comprehensive guide to their identification. Elsevier.	0.888643
Orcinus orca	Killer whale	90	AnAge;	3987500	AnAge	1.47434
Peponocephala electra	Melon-headed whale	47	AnAge; Amniote;	206000	AnAge; Amniote;	1.32889
Phocoena phocoena	Harbor porpoise	20.4	AnAge; Amniote;	52500	AnAge; ;	0.741962
Phocoena sinus	Vaquita	21	Jefferson, T. A., Webber, M. A., & Pitman, R. L. (2011). Marine mammals of the world: a comprehensive guide to their identification. Elsevier.	44061	Amniote;	0.788841
Phocoenoides dalli	Dall's porpoise	22	AnAge; Amniote;	120000	AnAge	0.687135
Physeter catodon	Sperm whale	77	AnAge; ;	28500000	AnAge	0.878038
Platanista gangetica	Ganges river dolphin	28	Amniote;	86500	Amniote;	0.928891
Pontoporia blainvillei	Franciscana	16	Amniote; ;	40417	Amniote;	0.610655
Pseudorca crassidens	False killer whale	62.5	AnAge; Amniote;	748000	AnAge	1.39352
Sotalia fluviatilis	Tucuxi	35	Amniote;	46667	Amniote	1.30089
Sotalia guianensis	Guiana dolphin	35	Jefferson, T. A., Webber, M. A., & Pitman, R. L. (2011). Marine mammals of the world: a comprehensive guide to their identification. Elsevier.	121000	Jefferson, T. A., Webber, M. A., & Pitman, R. L. (2011). Marine mammals of the world: a comprehensive guide to their identification. Elsevier.	1.0915
Sousa chinensis	Indo-Pacific humpbacked dolphin	40	Jefferson, T. A., Webber, M. A., & Pitman, R. L. (2011). Marine mammals of the world: a comprehensive guide to their identification. Elsevier.	280000	Amniote;	1.0688
Sousa teuszii	Atlantic humpbacked dolphin	20	Amniote	125000	Amniote;	0.619989
Stenella attenuata	Pantropical spotted dolphin	46	AnAge; Amniote;	112500	AnAge; Amniote;	1.45392
Stenella clymene	Clymene dolphin	29.025	Amniote	75000	Amniote;	0.988532
Stenella coeruleoalba	Striped dolphin	57.5	AnAge; Amniote;	112500	AnAge	1.8174
Stenella longirostris	Spinner dolphin	29.05	Amniote	72666.7	Amniote;	0.99516
Steno bredanensis	Rough-toothed dolphin	32	AnAge; ;	114000	AnAge	1.00896
Tursiops aduncus	Indo-Pacific bottlenose dolphin	53	Amniote	230000	Amniote;	1.46842
Tursiops truncatus	Bottlenosed dolphin	51.6	AnAge;	200000	AnAge	1.46691
Ziphius cavirostris	Cuvier's beaked whale	62	AnAge; Amniote	2701000	AnAge;	1.09121

## Sheet: 17 mammal
Species	Common name	Genome Version	Scaffold N50	Longevity/year	Adult body mass/g	Longevity Quotient
Ailuropoda melanoleuca	Giant panda	GCA 002007445.2	129245720	36.8	117500	1.15386
Bos taurus	Cattle	GCA 002263795.2	103308737	20	750000	0.445706
Canis familiaris	Dog	GCA 014441545.1	64037277	24	40000	0.917734
Eptesicus fuscus	Big brown bat	GCA 000308155.1	13454942	19	23	2.87163
Equus caballus	Horse	GCA 002863925.1	87230776	57	300000	1.50381
Gorilla gorilla	Gorillas	GCA 008122165.1	26116462	60.1	139842	1.82496
Heterocephalus glaber	Naked mole-rat	GCA 000247695.1	20532749	31	35	4.3366
Homo sapiens	Human	GCA 000001405.28	67794873	122.5	62035	4.32053
Mus musculus	House mouse	GCA 000001635.9	106145001	4	20.5	0.617504
Myotis brandtii	Brandt's bat	GCA 000412655.1	3225832	41	7	7.71475
Ochotona princeps	American pika	GCA 014633375.1	75838078	7	100	0.807055
Otolemur garnettii	Northern greater galago	GCA 000181295.3	13852661	20	1300	1.43763
Ovis aries	Sheep	GCA 016772045.1	101274418	22.8	80000	0.767345
Pan paniscus	Bonobo	GCA 013052645.1	68246502	55	39925	2.10387
Rattus norvegicus	Brown rat	GCA 015227675.2	135012528	3.8	300	0.357851
Sus scrofa	Wild boar	GCA 000003025.6	88231837	27	130000	0.83096
Ursus maritimus	Polar bear	GCA 017311325.1	72237886	43.8	475000	1.06177
