# Supplementary material for: Evolution of p53 pathway-related genes provides insights into anticancer mechanisms of natural longevity in cetaceans
Source: Research Square preprint supplement (doi:10.21203/rs.3.rs-1727364/v1), 2022-06-15
Supplement: Supplementary file 2 [file 2cc1de044aa8204f44980523.xlsx]

## Sheet: Table S7
Order	Common name	Adult weight (g)	Maximum longevity (yrs)	Data quality
Afrosoricida	Lesser hedgehog tenrec	180	19	acceptable
Afrosoricida	Dobson's shrew tenrec	37.8	5.6	acceptable
Afrosoricida	Talazac's shrew tenrec	50	5.8	acceptable
Afrosoricida	Greater hedgehog tenrec	225	14.1	acceptable
Afrosoricida	Tenrec	900	8.7	acceptable
Artiodactyla	Pronghorn	46100	15.5	acceptable
Artiodactyla	Addax	92500	28	high
Artiodactyla	Impala	52500	25.6	high
Artiodactyla	Hartebeest	159000	22.5	acceptable
Artiodactyla	Aoudad	92500	21.7	acceptable
Artiodactyla	Springbok	39000	19.8	high
Artiodactyla	Blackbuck	37500	23.9	high
Artiodactyla	American bison	630000	33.5	high
Artiodactyla	European bison	610000	26.4	acceptable
Artiodactyla	Gaur	825000	26.2	acceptable
Artiodactyla	Yak	667000	26.3	high
Artiodactyla	Banteng	700000	27.1	acceptable
Artiodactyla	Nilgai	180000	21.7	high
Artiodactyla	Water buffalo	725000	34.9	acceptable
Artiodactyla	Anoa	155000	36.1	acceptable
Artiodactyla	Mountain anoa	150000	29.2	acceptable
Artiodactyla	Takin	180000	21.9	acceptable
Artiodactyla	West Caucasian tur	70000	19.3	acceptable
Artiodactyla	East Caucasian tur	50000	20.2	acceptable
Artiodactyla	Markhor	41000	19.1	high
Artiodactyla	Domestic goat	61000	20.8	high
Artiodactyla	Ibex	82500	20.9	high
Artiodactyla	Nubian ibex	46250	22.4	acceptable
Artiodactyla	Siberian ibex	130000	22.3	acceptable
Artiodactyla	Japanese serow	80000	24	acceptable
Artiodactyla	Serow	95000	18.5	acceptable
Artiodactyla	Bay duiker	11600	17.5	acceptable
Artiodactyla	Jentink's duiker	70000.3	21	acceptable
Artiodactyla	Natal duiker	10000	15.2	acceptable
Artiodactyla	Black duiker	18100	14.8	acceptable
Artiodactyla	Black-fronted duiker	13900	17.9	acceptable
Artiodactyla	Red-flanked duiker	13000	15.2	acceptable
Artiodactyla	Yellow-backed duiker	62000	22.5	acceptable
Artiodactyla	Black wildebeest	132250	21.8	acceptable
Artiodactyla	Blue wildebeest	164500	24.3	high
Artiodactyla	Topi	110000	23.6	acceptable
Artiodactyla	Sassaby or blesbok	84500	23	high
Artiodactyla	Red-fronted gazelle	15011	14.5	acceptable
Artiodactyla	Thomson's gazelle	25000	20	acceptable
Artiodactyla	Cuvier's gazelle	17500	17.9	acceptable
Artiodactyla	Dorcas gazelle	14500	23.7	high
Artiodactyla	Mountain gazelle	23250	18.3	high
Artiodactyla	Rhim gazelle	48500	14.6	acceptable
Artiodactyla	Goitered gazelle	48500	16.3	high
Artiodactyla	Nilgiri tahr	75000	17.3	acceptable
Artiodactyla	Himalayan tahr	35200	21.8	acceptable
Artiodactyla	Roan antelope	225000	25.9	acceptable
Artiodactyla	Sable antelope	225000	22.2	high
Artiodactyla	Waterbuck	175333	30	high
Artiodactyla	Kob	105000	21.9	acceptable
Artiodactyla	Lechwe	94800	25.4	high
Artiodactyla	Nile lechwe	90000	21.1	high
Artiodactyla	Gerenuk	43500	17.3	acceptable
Artiodactyla	Gunther's dik-dik	4550	17.5	acceptable
Artiodactyla	Kirk's dik-dik	5000	17.3	acceptable
Artiodactyla	Red goral	28863	19	acceptable
Artiodactyla	Chinese goral	27000	20.3	acceptable
Artiodactyla	Goral	31750	17.6	acceptable
Artiodactyla	Dama gazelle	73000	19.3	acceptable
Artiodactyla	Grant's gazelle	67000	19.7	acceptable
Artiodactyla	Soemmering's gazelle	48500	15.5	acceptable
Artiodactyla	Suni	6500	13.5	acceptable
Artiodactyla	Royal antelope	2250	11.1	acceptable
Artiodactyla	Mountain goat	90000	20.8	acceptable
Artiodactyla	Klipspringer	12000	25.9	acceptable
Artiodactyla	Scimitar-horned oryx	177500	27.5	high
Artiodactyla	Gemsbok	170000	23.8	high
Artiodactyla	Arabian oryx	121350	20.8	high
Artiodactyla	Oribi	17000	15.9	acceptable
Artiodactyla	Muskox	315000	27.4	acceptable
Artiodactyla	Argali	160000	16.8	acceptable
Artiodactyla	Domestic sheep or mouflon	80000	22.8	high
Artiodactyla	Bighorn sheep	70275	20.6	acceptable
Artiodactyla	Dall's sheep	73100	19.6	acceptable
Artiodactyla	Maxwell's duiker	7000	18.3	acceptable
Artiodactyla	Blue duiker	6250	15.9	acceptable
Artiodactyla	Mongolian gazelle	30000	12	acceptable
Artiodactyla	Bharal	55000	20.9	acceptable
Artiodactyla	Steenbok	13000	9.3	acceptable
Artiodactyla	Southern reedbuck	58000	16.8	acceptable
Artiodactyla	Mountain reedbuck	30000	15	acceptable
Artiodactyla	Chamois	37500	17.6	acceptable
Artiodactyla	Bush duiker	18500	15.4	acceptable
Artiodactyla	African buffalo	700000	32.8	acceptable
Artiodactyla	Giant eland	680000	20.3	acceptable
Artiodactyla	Eland	500000	26.1	high
Artiodactyla	Four-horned antelope	19000	17.4	acceptable
Artiodactyla	Nyala	120000	18.5	acceptable
Artiodactyla	Bongo	307500	21.9	high
Artiodactyla	Lesser kudu	82500	19.8	acceptable
Artiodactyla	Bushbuck	60000	15.3	acceptable
Artiodactyla	Sitatunga	87500	22.6	high
Artiodactyla	Greater kudu	217500	23.5	high
Artiodactyla	Bactrian camel	475000	35.4	high
Artiodactyla	Dromedary	434000	28.4	acceptable
Artiodactyla	Llama	140000	28.9	high
Artiodactyla	Guanaco	127500	33.7	high
Artiodactyla	Alpaca	62000	25.8	high
Artiodactyla	Vicugna	50000	31.6	acceptable
Artiodactyla	Chital	36000	20.8	high
Artiodactyla	Calamian deer	40500	17.2	acceptable
Artiodactyla	Bawean deer	55000	17.8	acceptable
Artiodactyla	Hog deer	43000	22.9	acceptable
Artiodactyla	Western roe deer	21666.7	17.5	acceptable
Artiodactyla	Red deer	200000	31.5	high
Artiodactyla	Sika deer	42000	26.3	high
Artiodactyla	Fallow deer	70000	21.1	high
Artiodactyla	Tufted deer	33500	22.7	acceptable
Artiodactyla	Pere David's deer	186500	27.5	high
Artiodactyla	Chinese water deer	11500	13.9	acceptable
Artiodactyla	Red brocket	33000	17.1	acceptable
Artiodactyla	Gray brocket	17000	14.8	acceptable
Artiodactyla	Indian muntjac	21000	18.8	acceptable
Artiodactyla	Reeves's muntjac	18000	23.2	high
Artiodactyla	Mule deer	57000	22	acceptable
Artiodactyla	White-tailed deer	87000	23	high
Artiodactyla	Pampas deer	32500	21.9	acceptable
Artiodactyla	Thorold's deer	135000	21.3	acceptable
Artiodactyla	Southern pudu	10000	18.3	acceptable
Artiodactyla	Caribou and reindeer	101250	21.8	high
Artiodactyla	Barasingha	170000	24.5	high
Artiodactyla	Eld's deer	122500	20.5	high
Artiodactyla	Visayan spotted deer	46475	18.5	acceptable
Artiodactyla	Timor deer	63000	21.1	acceptable
Artiodactyla	Sambar	185000	26.4	acceptable
Artiodactyla	Giraffe	800000	39.5	high
Artiodactyla	Okapi	225000	33.5	acceptable
Artiodactyla	Pygmy hippopotamus	215000	42.3	acceptable
Artiodactyla	Hippopotamus	3750000	61.2	acceptable
Artiodactyla	Babirusa	71500	22.9	acceptable
Artiodactyla	Wart hog	100000	20.9	high
Artiodactyla	Red river hog	88000	22	high
Artiodactyla	Bearded pig	102750	16.2	acceptable
Artiodactyla	Pygmy hog	8000	14	acceptable
Artiodactyla	Wild boar	130000	27	high
Artiodactyla	Javan pig	76000	17	acceptable
Artiodactyla	Collared peccary	20200	31.5	high
Artiodactyla	White-lipped peccary	22000	28.5	acceptable
Artiodactyla	Indian spotted chevrotain	2450	14.5	acceptable
Artiodactyla	Lesser mouse-deer	2850	14	acceptable
Artiodactyla	Greater mouse-deer	6500	16.7	acceptable
Carnivora	Red panda	4325	19	high
Carnivora	Short-eared dog	9500	11.9	acceptable
Carnivora	Side-striped jackal	10250	13.7	acceptable
Carnivora	Golden jackal	11000	18.8	acceptable
Carnivora	Domestic dog	40000	24	acceptable
Carnivora	Coyote	13250	21.8	acceptable
Carnivora	Gray wolf	26625	20.6	high
Carnivora	Black-backed jackal	10250	16.7	acceptable
Carnivora	Crab-eating fox	6500	12.7	acceptable
Carnivora	Maned wolf	21500	16.8	acceptable
Carnivora	Dhole	15750	16.1	acceptable
Carnivora	Culpeo	13000	13.1	acceptable
Carnivora	Argentinian gray fox	3990	10.9	acceptable
Carnivora	Pampas fox	8500	13.7	acceptable
Carnivora	Sechuran fox	4000	9.9	acceptable
Carnivora	Hoary fox	5350	12.6	acceptable
Carnivora	African wild dog	26500	17	high
Carnivora	Raccoon dog	6500	16.6	acceptable
Carnivora	Bat-eared fox	4150	17	acceptable
Carnivora	Bush dog	6000	14.1	acceptable
Carnivora	Gray fox	4750	16.2	acceptable
Carnivora	Corsac fox	2700	13	acceptable
Carnivora	Arctic fox	5200	16.3	acceptable
Carnivora	Kit fox	2500	15.8	acceptable
Carnivora	Pale fox	2800	16	acceptable
Carnivora	Ruppell's sand fox	3200	14.3	acceptable
Carnivora	Swift fox	2400	15.9	acceptable
Carnivora	Red fox	4131.7	21.3	acceptable
Carnivora	Fennec	1250	16.3	acceptable
Carnivora	Fossa	9500	23.1	acceptable
Carnivora	Malagasy civet	1540	21.4	acceptable
Carnivora	Ring-tailed mongoose	800	26	acceptable
Carnivora	Cheetah	53500	20.5	high
Carnivora	Caracal	16000	20.3	acceptable
Carnivora	Asiatic golden cat	13500	23	acceptable
Carnivora	Jungle cat	10000	20	acceptable
Carnivora	Pallas' cat	3500	15.9	acceptable
Carnivora	Sand cat	2750	13.9	acceptable
Carnivora	Black-footed cat	2125	15.6	acceptable
Carnivora	Wild cat	5500	19	acceptable
Carnivora	Colocolo	2950	19.6	acceptable
Carnivora	Geoffroy's cat	4000	23	acceptable
Carnivora	Ocelot	8800	28.2	acceptable
Carnivora	Little spotted cat	2250	21.9	acceptable
Carnivora	Margay	3666.7	24	acceptable
Carnivora	Serval	13350	22.4	high
Carnivora	Canada lynx	10100	26.8	acceptable
Carnivora	Eurasian lynx	23000	23.7	high
Carnivora	Bobcat	8600	32.3	acceptable
Carnivora	Clouded leopard	19500	19.8	acceptable
Carnivora	Lion	175000	27	high
Carnivora	Jaguar	81150	28	high
Carnivora	Leopard	53750	27.3	high
Carnivora	Tiger	119700	26.3	high
Carnivora	Leopard cat	5000	17	acceptable
Carnivora	Flat-headed cat	6750	14	acceptable
Carnivora	Rusty-spotted cat	1350	17.9	acceptable
Carnivora	Fishing cat	10650	17.2	acceptable
Carnivora	African golden cat	10650	21	acceptable
Carnivora	Cougar	63000	23.8	acceptable
Carnivora	Jaguarundi	7000	18.6	acceptable
Carnivora	Snow leopard	50000	21.2	high
Carnivora	Marsh mongoose	3300	20.8	acceptable
Carnivora	Black-footed mongoose	2000	15.8	acceptable
Carnivora	Long-nosed cusimanse	790	13.3	acceptable
Carnivora	Yellow mongoose	598.5	15.2	acceptable
Carnivora	Cape gray mongoose	650	11.7	acceptable
Carnivora	Slender mongoose	500	12.6	acceptable
Carnivora	Dwarf mongoose	274.8	18	high
Carnivora	Indian gray mongoose	1000	12.3	acceptable
Carnivora	Javan mongoose	800	16.6	acceptable
Carnivora	Ruddy mongoose	1702.5	17.8	acceptable
Carnivora	Crab-eating mongoose	1863.2	13.3	acceptable
Carnivora	Striped-necked mongoose	2250	12.8	acceptable
Carnivora	White-tailed mongoose	3500	14.8	acceptable
Carnivora	Banded mongoose	1331.5	17.4	high
Carnivora	Meerkat	776	20.6	high
Carnivora	Spotted hyena	63000	41.1	acceptable
Carnivora	Brown hyena	42250	31.9	acceptable
Carnivora	Striped hyena	40000	25	acceptable
Carnivora	Aardwolf	10000	20	acceptable
Carnivora	Molina's hog-nosed skunk	3400	10	acceptable
Carnivora	Hog-nosed skunk	1900	10.2	acceptable
Carnivora	Striped skunk	3500	13.9	acceptable
Carnivora	Eastern spotted skunk	600	10.5	acceptable
Carnivora	African clawless otter	23500	14.2	acceptable
Carnivora	Oriental small-clawed otter	3000	23	acceptable
Carnivora	Hog badger	10500	15.8	acceptable
Carnivora	Tayra	4500	22.3	acceptable
Carnivora	Sea otter	25850	27	acceptable
Carnivora	Lesser grison	1000	10.2	acceptable
Carnivora	Greater grison	2300	12.5	acceptable
Carnivora	Wolverine	16333.3	19.5	acceptable
Carnivora	Spotted-necked otter	4000	22.9	acceptable
Carnivora	Striped polecat	910	14	acceptable
Carnivora	Northern river otter	9000	27	acceptable
Carnivora	European otter	6750	18.2	acceptable
Carnivora	American marten	884	17.8	acceptable
Carnivora	Yellow-throated marten	2500	16	acceptable
Carnivora	Beech marten	1700	18.2	acceptable
Carnivora	European pine marten	1300	18.2	acceptable
Carnivora	Fisher	3175	14.3	acceptable
Carnivora	Sable	1066.7	18.4	acceptable
Carnivora	Old World badger	13000	18.6	acceptable
Carnivora	Honey badger	10000	31.3	acceptable
Carnivora	Chinese ferret-badger	672	19	acceptable
Carnivora	Ermine	110.3	12.5	acceptable
Carnivora	Steppe polecat	1350	9.1	acceptable
Carnivora	Long-tailed weasel	150.6	8.8	acceptable
Carnivora	European mink	590	8.4	acceptable
Carnivora	Black-footed ferret	1021	9.4	acceptable
Carnivora	Least weasel	46.9	9.1	acceptable
Carnivora	European polecat	809	11.1	acceptable
Carnivora	Siberian weasel	565	8.8	acceptable
Carnivora	American mink	925	11.4	acceptable
Carnivora	Giant otter	24000	17.3	acceptable
Carnivora	American badger	8000	25	acceptable
Carnivora	Marbled polecat	542.5	8.8	acceptable
Carnivora	African palm civet	1900	21	acceptable
Carnivora	South American fur seal	110000	30.6	acceptable
Carnivora	South African fur seal	127551	32.1	acceptable
Carnivora	Steller sea lion	415000	32.8	acceptable
Carnivora	Australian sea lion	190000	24.1	acceptable
Carnivora	Southern sea lion	207500	29	acceptable
Carnivora	California sea lion	180000	35.7	high
Carnivora	Gray seal	268000	42.9	acceptable
Carnivora	Harbor seal	115000	47.6	acceptable
Carnivora	Ringed seal	90000	46	acceptable
Carnivora	Baikal seal	90000	56	acceptable
Carnivora	Allen's olingo	1235	25.2	acceptable
Carnivora	Olingo	1235	21.8	acceptable
Carnivora	Ringtail	1015	19	acceptable
Carnivora	Cacomistle	900	24	acceptable
Carnivora	White-nosed coati	3750	26.4	acceptable
Carnivora	South american coati	4750	23.7	high
Carnivora	Kinkajou	3000	38.4	acceptable
Carnivora	Crab-eating raccoon	6270	19	acceptable
Carnivora	Common raccoon	6000	21	acceptable
Carnivora	Giant panda	117500	36.8	acceptable
Carnivora	Sun bear	46000	35.9	acceptable
Carnivora	Sloth bear	100000	33.3	acceptable
Carnivora	Spectacled bear	109250	39	acceptable
Carnivora	American black bear	154250	34	acceptable
Carnivora	Brown bear	277500	40	acceptable
Carnivora	Polar bear	475000	43.8	acceptable
Carnivora	Asiatic black bear	103750	39.2	acceptable
Carnivora	Binturong	12250	27	acceptable
Carnivora	Small-toothed palm civet	2250	16.1	acceptable
Carnivora	African civet	13666.7	28	acceptable
Carnivora	Small-spotted genet	1866.7	22.7	acceptable
Carnivora	Panther genet	2225	20	acceptable
Carnivora	Large-spotted genet	1820	21.3	acceptable
Carnivora	Banded palm civet	2400	16	acceptable
Carnivora	Masked palm civet	4300	27.4	acceptable
Carnivora	Asian palm civet	3100	24.5	acceptable
Carnivora	Large indian civet	10000	21.7	acceptable
Cetacea	Bowhead whale	100000000	211	acceptable
Cetacea	Southern right whale	45000000	70	acceptable
Cetacea	North atlantic right whale	23000000	67	acceptable
Cetacea	Common minke whale	7500000	50	acceptable
Cetacea	Sei whale	20000000	74	acceptable
Cetacea	Bryde's whale	16000000	72	acceptable
Cetacea	Blue whale	136000000	110	acceptable
Cetacea	Fin whale	70000000	114	acceptable
Cetacea	Humpback whale	30000000	95	acceptable
Cetacea	Short-finned pilot whale	2200000	63	acceptable
Cetacea	Long-finned pilot whale	1060000	60	acceptable
Cetacea	Risso's dolphin	425000	42.5	acceptable
Cetacea	Atlantic white-sided dolphin	208000	27	acceptable
Cetacea	Pacific white-sided dolphin	103000	46	acceptable
Cetacea	Irrawaddy dolphin	190000	30	acceptable
Cetacea	Killer whale	3987500	90	acceptable
Cetacea	Melon-headed whale	206000	47	acceptable
Cetacea	False killer whale	748000	62.5	acceptable
Cetacea	Pantropical spotted dolphin	112500	46	acceptable
Cetacea	Striped dolphin	112500	57.5	acceptable
Cetacea	Rough-toothed dolphin	114000	32	acceptable
Cetacea	Bottlenosed dolphin	200000	51.6	acceptable
Cetacea	Gray whale	28500000	77	acceptable
Cetacea	Baird's beaked whale	11380000	84	acceptable
Cetacea	Northern bottlenose whale	6500000	37	acceptable
Cetacea	Gervais's beaked whale	5600000	48	acceptable
Cetacea	Cuvier's beaked whale	2701000	62	acceptable
Cetacea	Amazon dolphin	84000	31.3	acceptable
Cetacea	Pygmy sperm whale	424600	17	acceptable
Cetacea	Beluga	1430000	40	acceptable
Cetacea	Narwhal	1250000	50	acceptable
Cetacea	Finless porpoise	32500	33	acceptable
Cetacea	Harbor porpoise	52500	20.4	acceptable
Cetacea	Dall's porpoise	120000	22	acceptable
Cetacea	Sperm whale	28500000	77	acceptable
Cetacea	Antarctic minke whale	7500000	73	acceptable
Cetacea	Arnoux's beaked whale	7000000	84	acceptable
Cetacea	Baird's beaked whale	11380000	84	acceptable
Cetacea	Commerson's dolphin	68700	25.8	acceptable
Cetacea	Hector's dolphin	50000	20	acceptable
Cetacea	Short-beaked common dolphin	77818.3	29.025	acceptable
Cetacea	North Pacific right whale	23000000	67	acceptable
Cetacea	Pygmy killer whale	151500	21	acceptable
Cetacea	Southern bottlenose Whale	5440000	37	acceptable
Cetacea	Dwarf sperm whale	186650	22	acceptable
Cetacea	Fraser's dolphin	164000	16	acceptable
Cetacea	White-beaked dolphin	183317	13	acceptable
Cetacea	Peale's dolphin	180000	13	acceptable
Cetacea	Hourglass dolphin	72400	46	acceptable
Cetacea	Dusky dolphin	80000	36	acceptable
Cetacea	Baiji	83500	24	acceptable
Cetacea	Northern right whale dolphins	113000	42	acceptable
Cetacea	Hector's beaked whale	900000	30	acceptable
Cetacea	Stejneger's beaked whale	1930000	35	acceptable
Cetacea	Yangtze finless porpoise	30000	25	acceptable
Cetacea	Australian snubfin dolphin	160000	30	acceptable
Cetacea	Vaquita	44061	21	acceptable
Cetacea	Ganges river dolphin	86500	28	acceptable
Cetacea	Franciscana	40417	16	acceptable
Cetacea	Tucuxi	46667	35	acceptable
Cetacea	Guiana dolphin	121000	35	acceptable
Cetacea	Indo-Pacific humpbacked dolphin	280000	40	acceptable
Cetacea	Indian humpbacked dolphin	280000	40	acceptable
Cetacea	Atlantic humpbacked dolphin	125000	20	acceptable
Cetacea	Clymene dolphin	75000	29.025	acceptable
Cetacea	Spinner dolphin	72666.7	29.05	acceptable
Cetacea	Indo-Pacific bottlenose dolphin	230000	53	acceptable
Cingulata	Screaming hairy armadillo	840	16.2	acceptable
Cingulata	Large hairy armadillo	3000	25.2	acceptable
Cingulata	Nine-banded armadillo	5500	22.3	acceptable
Cingulata	Six-banded armadillo	4850	22.1	acceptable
Cingulata	Giant armadillo	33000	15	acceptable
Cingulata	Southern three-banded armadillo	1500	36.8	acceptable
Cingulata	Pichi	1500	12.5	acceptable
Erinaceomorpha	Four-toed hedgehog	500	11.4	high
Erinaceomorpha	Eastern European hedgehog	719	7	acceptable
Erinaceomorpha	Western European hedgehog	750	11.7	acceptable
Erinaceomorpha	Long-eared hedgehog	342	7.6	acceptable
Erinaceomorpha	Desert hedgehog	188	6.3	acceptable
Erinaceomorpha	Brandt's hedgehog	292	7	acceptable
Hyracoidea	Tree hyrax	3000	13.6	acceptable
Hyracoidea	Rock hyrax	3600	14.8	acceptable
Lagomorpha	Japanese hare	2519	13	acceptable
Lagomorpha	Black-tailed jackrabbit	4175	11.8	acceptable
Lagomorpha	European hare	4175	10.7	acceptable
Lagomorpha	Mountain hare	4175	18	acceptable
Lagomorpha	Audubon's cottontail rabbit	900	7.8	acceptable
Lagomorpha	Eastern cottontail	1150	9.8	acceptable
Lagomorpha	Mountain cottontail	760	7.4	acceptable
Lagomorpha	Marsh rabbit	1233	7.6	acceptable
Lagomorpha	New England cottontail	902.6	9.3	acceptable
Lagomorpha	Northern pika	120	9.4	acceptable
Lagomorpha	American pika	100	7	acceptable
Macroscelidea	Long-eared elephant shrew	52	9.3	acceptable
Macroscelidea	North African elephant shrew	48	7.2	acceptable
Macroscelidea	Rufous elephant shrew	58	7.9	acceptable
Macroscelidea	Short-eared elephant shrew	40	8.7	acceptable
Macroscelidea	Golden-rumped elephant shrew	540	11	acceptable
Monotremata	Duck-billed platypus	1250	22.6	acceptable
Monotremata	Short-beaked echidna	3500	49.5	acceptable
Monotremata	Long-nosed echidna	7500	41.2	acceptable
Perissodactyla	African wild ass	164998	47	high
Perissodactyla	Horse	300000	57	high
Perissodactyla	Grevy's zebra	384000	31	high
Perissodactyla	Kulan	230000	31.6	acceptable
Perissodactyla	Kiang	275000	30.1	acceptable
Perissodactyla	Quagga	280000	38	high
Perissodactyla	Mountain zebra	296000	33.2	acceptable
Perissodactyla	White rhinoceros	2175000	45	high
Perissodactyla	Sumatran rhinoceros	1260000	32.8	acceptable
Perissodactyla	Black rhinoceros	1100000	49	acceptable
Perissodactyla	Indian rhinoceros	1602330	43.5	acceptable
Perissodactyla	Malayan tapir	250000	36.5	acceptable
Perissodactyla	Baird's tapir	300000	29.6	acceptable
Perissodactyla	Mountain tapir	148950	28.5	acceptable
Perissodactyla	Brazilian tapir	250000	39.6	high
Pilosa	Southern two-toed sloth	6250	36.8	acceptable
Pilosa	Hoffmann's two-toed sloth	6250	41	acceptable
Pilosa	Giant anteater	28500	31	acceptable
Pilosa	Northern tamandua	4500	16	acceptable
Pilosa	Southern tamandua	4500	19	acceptable
Primates	Azara's night monkey	1230	30	acceptable
Primates	Lemurine night monkey	874	33.8	acceptable
Primates	Northern night monkey	800	30.1	acceptable
Primates	Noisy night monkey	873	22.1	acceptable
Primates	Black howler monkey	5462.5	32.4	acceptable
Primates	Mantled howler monkey	7000	24	acceptable
Primates	Red howler monkey	6543.2	25	acceptable
Primates	White-bellied spider monkey	7535	37	acceptable
Primates	Chamek spider monkey	6000	42.8	acceptable
Primates	Brown-headed spider monkey	7000	46	acceptable
Primates	Central American spider monkey	7267.5	47.1	acceptable
Primates	White-whiskered spider monkey	6000	44	acceptable
Primates	Black spider monkey	7887.5	46	acceptable
Primates	Woolly spider monkey or muriqui	11170	40	acceptable
Primates	Humboldt's woolly monkey	7650	32	acceptable
Primates	Goeldi's monkey	555	22.2	high
Primates	Geoffroy's marmoset	342	17.6	acceptable
Primates	White-tufted-ear marmoset	255.2	22.8	high
Primates	Weid's black-tufted-ear marmoset	342	20	acceptable
Primates	Black-pencilled marmoset	307	15.4	acceptable
Primates	Pygmy marmoset	124	18.6	high
Primates	Saddlebacked tamarin	456.5	24.9	acceptable
Primates	Black-mantled tamarin	519.2	20.2	acceptable
Primates	Golden-headed lion tamarin	535	21.3	acceptable
Primates	Golden lion tamarin	654.5	31.6	high
Primates	Silvery marmoset	343.2	16.5	acceptable
Primates	Tassel-eared marmoset	355.8	15	acceptable
Primates	Brazilian bare-faced tamarin	495.8	19	acceptable
Primates	Geoffroy's tamarin	499.3	20.5	acceptable
Primates	Emperor tamarin	518.5	23.7	high
Primates	Red-chested mustached tamarin	501.3	20.5	acceptable
Primates	Silvery-brown bare-face tamarin	490	15.2	acceptable
Primates	Midas tamarin	553.8	21	high
Primates	Black-chested mustached tamarin	543.5	20	acceptable
Primates	Cotton-top tamarin	445.5	26.2	high
Primates	White-fronted capuchin	2467.5	40.4	acceptable
Primates	White-faced capuchin	2655	54	acceptable
Primates	Weeping capuchin	2552.5	47	acceptable
Primates	Bolivian squirrel monkey	615	30.3	acceptable
Primates	South American squirrel monkey	925	30.2	high
Primates	Brown capuchin	2642.5	46	high
Primates	Allen's swamp monkey	4702.5	27	acceptable
Primates	L'hoest's monkey	4700	24.1	acceptable
Primates	Preuss's monkey	5250	26	acceptable
Primates	Agile mangabey	8000	31	acceptable
Primates	Red-capped mangabey	9492.5	46	acceptable
Primates	Black-cheeked white-nosed monkey	3705	31.2	acceptable
Primates	Campbell's monkey	3600	30	acceptable
Primates	Moustached monkey	3585	36	acceptable
Primates	Diana monkey	4550	35.1	acceptable
Primates	Red-bellied monkey	3250	24	acceptable
Primates	Owl-faced monkey	4425	28.6	acceptable
Primates	Blue monkey	9000	37.8	acceptable
Primates	Mona monkey	4500	30	acceptable
Primates	De Brazza's monkey	5945	30.8	acceptable
Primates	White-nosed guenon	5465	31	acceptable
Primates	Lesser white-nosed monkey	3650	29	acceptable
Primates	Crowned guenon	3580	27	acceptable
Primates	Wolf's monkey	3390	24	acceptable
Primates	Vervet	5620	30.8	acceptable
Primates	Angolan colobus	8625	35.3	acceptable
Primates	Guereza	9950	35	high
Primates	King colobus	9525	33.9	acceptable
Primates	Patas monkey	7750	28.3	acceptable
Primates	Gray-cheeked mangabey	9317.5	36	acceptable
Primates	Stump-tailed macaque	9275	29.2	acceptable
Primates	Assam macaque	9100	31.4	acceptable
Primates	Long-tailed macaque	6362.5	39	acceptable
Primates	Japanese macaque	8882.5	38.5	high
Primates	Moor macaque	5575	33	acceptable
Primates	Rhesus monkey	8235	40	high
Primates	Pigtail macaque	7912.5	37.6	acceptable
Primates	Celebes crested macaque	7965	34	acceptable
Primates	Booted macaque	3950	29	acceptable
Primates	Bonnet macaque	6755	30	acceptable
Primates	Liontail macaque	7875	40	high
Primates	Toque macaque	4370	29.3	acceptable
Primates	Barbary macaque	10875	29.1	high
Primates	Tibetan macaque	10300	27	acceptable
Primates	Tonkean macaque	11950	28.4	acceptable
Primates	Drill	18250	39	acceptable
Primates	Mandrill	23000	40	high
Primates	Talapoin	1384.5	27.7	acceptable
Primates	Proboscis monkey	14617.5	25.1	acceptable
Primates	Hamadryas baboon	18000	37.5	high
Primates	Mitred leaf monkey	6540	20	acceptable
Primates	Douc langur	9720	26	acceptable
Primates	Golden snub-nosed monkey	14750	29.5	acceptable
Primates	Hanuman langur	13516.5	29	acceptable
Primates	Hooded leaf monkey	12000	34	acceptable
Primates	Purple-faced leaf monkey	7081.8	26.1	acceptable
Primates	Gelada baboon	16200	36	acceptable
Primates	Javan langur	9720	31.1	acceptable
Primates	Silvered leaf monkey	6185	28.3	acceptable
Primates	Fran?ois's leaf monkey	7325	26.3	acceptable
Primates	Dusky leaf monkey	7080	33.9	acceptable
Primates	Phayre's leaf monkey	8400	28.3	acceptable
Primates	Capped leaf monkey	11450	25.2	acceptable
Primates	Fat-tailed dwarf lemur	380	29	acceptable
Primates	Gray mouse lemur	64.8	18.2	acceptable
Primates	Giant mouse lemur	311.2	17.4	acceptable
Primates	Fork-marked lemur	400	25	acceptable
Primates	Aye-aye	2277.5	32.3	acceptable
Primates	South African galago	169.2	16.6	acceptable
Primates	Senegal galago	192.2	17.1	acceptable
Primates	Demidoff's galago	60	13.4	acceptable
Primates	Greater galago	1094.5	22.7	acceptable
Primates	Small-eared galago	1300	20	acceptable
Primates	Gorilla	139842	60.1	acceptable
Primates	Human	62035	122.5	high
Primates	Pygmy chimpanzee or bonobo	39925	55	acceptable
Primates	Chimpanzee	44983.5	59.4	acceptable
Primates	Orangutan	64475	59	acceptable
Primates	Hoolock gibbon	6875	41	acceptable
Primates	Agile gibbon	5925	49	acceptable
Primates	Kloss's gibbon	5900	37	acceptable
Primates	White-handed gibbon	6810	56	high
Primates	Silvery gibbon	6207.5	45	acceptable
Primates	Borneo gibbon	5765	60	acceptable
Primates	Pileated gibbon	5735	38	acceptable
Primates	Crested gibbon	6852.5	46.1	acceptable
Primates	White-cheeked gibbon	6000	44.1	acceptable
Primates	Siamang	10900	43	acceptable
Primates	Verreaux's sifaka	5000	31	acceptable
Primates	Crowned lemur	1645	27	acceptable
Primates	Brown lemur	2485	35.5	acceptable
Primates	Black lemur	2467	37.5	acceptable
Primates	Mongoose lemur	1555	36.2	acceptable
Primates	Red-bellied lemur	2191.5	31.7	acceptable
Primates	Bamboo lemur	1012.5	23.3	acceptable
Primates	Ring-tailed lemur	2555	37.3	high
Primates	Greater bamboo lemur	1737.5	17.6	acceptable
Primates	Red ruffed lemur	3601.3	37.5	acceptable
Primates	Ruffed lemur	3482.3	39.4	high
Primates	Calabar angwantibo	257.5	13	acceptable
Primates	Slender loris	238.2	21.6	acceptable
Primates	Slow loris	890.5	25.8	acceptable
Primates	Pygmy slow loris	419	19.3	acceptable
Primates	Potto	919.9	32.4	acceptable
Primates	Red uakari	3165	35.8	acceptable
Primates	White-nosed bearded saki	2910	20	acceptable
Primates	Brown-bearded saki	2942.5	19.6	acceptable
Primates	Monk saki	1780	25	acceptable
Primates	Guianan saki	1480	36	high
Primates	Coppery titi	1120	26.4	acceptable
Primates	Bolivian titi	795	25	acceptable
Primates	Dusky titi	804	26.2	acceptable
Primates	Philippine tarsier	119.2	16	acceptable
Primates	Western tarsier	122.5	16.3	acceptable
Proboscidea	Asiatic elephant	3178000	65.5	acceptable
Proboscidea	African bush elephant	4800000	65	acceptable
Rodentia	Bennett's chinchilla rat	265.5	2.3	acceptable
Rodentia	Ansell's mole-rat	90	20.6	acceptable
Rodentia	Damaraland mole-rat	180	15.5	acceptable
Rodentia	Naked mole-rat	35	31	high
Rodentia	Mouse-like hamster	20.4	9.4	acceptable
Rodentia	Desmarest's hutia	4683.3	13.8	acceptable
Rodentia	Brown's hutia	1500	13.5	acceptable
Rodentia	Hispaniolan hutia	1267	15.9	acceptable
Rodentia	American beaver	20250	23.4	acceptable
Rodentia	Brazilian guinea pig	341	6	high
Rodentia	Guinea pig	728	12	high
Rodentia	Montane guinea pig	637.5	6.3	acceptable
Rodentia	Patagonian mara	12500	14.4	high
Rodentia	Common yellow-toothed cavy	337.9	3.5	acceptable
Rodentia	Spix's yellow-toothed cavy	450	4.6	acceptable
Rodentia	Capybara	55000	15.1	high
Rodentia	Rock cavy	950	12.9	acceptable
Rodentia	Long-tailed chinchilla	642.5	17.2	acceptable
Rodentia	Mountain viscacha	1540	19.5	acceptable
Rodentia	Plains viscacha	6000	10.8	acceptable
Rodentia	European water vole	120	2.5	acceptable
Rodentia	Northern pygmy mouse	8	3.3	acceptable
Rodentia	Black-bellied hamster	506.7	3.6	acceptable
Rodentia	Collared lemming	66	3.3	acceptable
Rodentia	Northern mole vole	40	5	acceptable
Rodentia	Steppe lemming	20.3	3.8	acceptable
Rodentia	Brandt's vole	40	4.1	acceptable
Rodentia	Norway lemming	70	3.3	acceptable
Rodentia	Crested rat	755	7.5	acceptable
Rodentia	Golden hamster	105	3.9	acceptable
Rodentia	Brandt's hamster	174	4.4	acceptable
Rodentia	Field vole	46	4.8	acceptable
Rodentia	Common vole	27.5	4.8	acceptable
Rodentia	Vole	51.6	3.9	acceptable
Rodentia	Prairie vole	40	5.3	acceptable
Rodentia	Woodland vole	25.5	3.8	acceptable
Rodentia	Bank vole	20.8	4.9	acceptable
Rodentia	White-throated woodrat	209	9.5	acceptable
Rodentia	Eastern woodrat	291	8.6	acceptable
Rodentia	Desert woodrat	236	10.5	acceptable
Rodentia	Vesper rat	50	5.7	acceptable
Rodentia	Golden mouse	22	8.4	acceptable
Rodentia	Northern grasshopper mouse	32.5	5.6	acceptable
Rodentia	Southern grasshopper mouse	22	4.6	acceptable
Rodentia	California mouse	42	5.5	acceptable
Rodentia	Canyon mouse	16.5	7.7	acceptable
Rodentia	Cactus mouse	25	7.4	acceptable
Rodentia	Guatemalan deer mouse	40	5.7	acceptable
Rodentia	White-footed mouse	23	7.9	acceptable
Rodentia	Deer mouse	20.5	8.3	acceptable
Rodentia	Oldfield mouse	14	5.5	acceptable
Rodentia	Pinyon mouse	25	5.4	acceptable
Rodentia	Dzhungarian hamster	23.4	3.9	acceptable
Rodentia	Florida mouse	32	7.4	acceptable
Rodentia	Bunny or coney rat	72.2	5.5	acceptable
Rodentia	Hispid cotton rat	185	5.2	acceptable
Rodentia	Peters's climbing rat	280	5.4	acceptable
Rodentia	Gundi	288.8	5.8	acceptable
Rodentia	Lowland paca	9000	16.3	acceptable
Rodentia	Mountain paca	8999.9	18.9	acceptable
Rodentia	Azara's agouti	2650	11.8	acceptable
Rodentia	Crested agouti	2650	14	acceptable
Rodentia	Black agouti	3500	18	acceptable
Rodentia	Agouti	3265	17.8	high
Rodentia	Mexican agouti	2700	13.1	acceptable
Rodentia	Black-rumped agouti	2900	16.3	acceptable
Rodentia	Central American agouti	2150	13.8	acceptable
Rodentia	Red acouchi	775	14.8	acceptable
Rodentia	Pacarana	12250	12.8	acceptable
Rodentia	Small five-toed jerboa	58.7	5.2	acceptable
Rodentia	Euphrates jerboa	232	4.2	acceptable
Rodentia	Great jerboa	350	7	acceptable
Rodentia	Mongolian five-toed jerboa	117.5	4.5	acceptable
Rodentia	Lesser Egyptian jerboa	55	7.3	acceptable
Rodentia	Greater Egyptian jerboa	134	5.5	acceptable
Rodentia	Meadow jumping mouse	18	5.6	acceptable
Rodentia	Armored rat	504	7	acceptable
Rodentia	Andean spiny rat. Short-tailed spiny-rat	285	6.8	acceptable
Rodentia	Spiny rat	500	5.8	acceptable
Rodentia	Brazilian spiny rat	373.5	7	acceptable
Rodentia	Prehensile-tailed porcupine	3900	26.6	acceptable
Rodentia	North American porcupine	8600	23.4	acceptable
Rodentia	Mexican hairy dwarf porcupine	2000	16.7	acceptable
Rodentia	Plains pocket gopher	176.7	12	acceptable
Rodentia	Botta's pocket gopher	115.5	6.1	acceptable
Rodentia	Forest dormouse	26	4.1	acceptable
Rodentia	Asian garden dormouse	122.5	6.2	acceptable
Rodentia	Garden dormouse	82.5	5.5	acceptable
Rodentia	Japanese dormouse	27	7	acceptable
Rodentia	Fat dormouse	125	8.7	acceptable
Rodentia	Woodland dormouse	24	6.9	acceptable
Rodentia	Rock dormouse	46.1	7.3	acceptable
Rodentia	Hazel dormouse	27.3	5.3	acceptable
Rodentia	San Diego pocket mouse	18.7	8.3	acceptable
Rodentia	Long-tailed pocket mouse	19	7.1	acceptable
Rodentia	Desert kangaroo rat	116	8.6	acceptable
Rodentia	Heermann's kangaroo rat	65	8.3	acceptable
Rodentia	Merriam's kangaroo rat	42	9.7	acceptable
Rodentia	Ord's kangaroo rat	57	9.9	acceptable
Rodentia	Banner-tailed kangaroo rat	145	12.7	acceptable
Rodentia	Arizona pocket mouse	11.7	5.9	acceptable
Rodentia	Little pocket mouse	8	8.3	acceptable
Rodentia	Great Basin pocket mouse	20.1	5.8	acceptable
Rodentia	African brush-tailed porcupine	2750	22.9	acceptable
Rodentia	Cape porcupine	24000	23.1	acceptable
Rodentia	Malayan porcupine	8000	27.3	acceptable
Rodentia	African porcupine	20000	28	acceptable
Rodentia	Indian crested porcupine	20000	27.1	acceptable
Rodentia	Spiny mouse	45.2	5.9	high
Rodentia	Wilson's spiny mouse	20	5.6	acceptable
Rodentia	Yellow-necked mouse	29.4	4.5	acceptable
Rodentia	Korean field mouse	32.9	4.4	acceptable
Rodentia	Large Japanese field mouse	44	5.3	acceptable
Rodentia	Long-tailed field mouse	23.4	6.3	acceptable
Rodentia	Nile kusu	110	6.7	acceptable
Rodentia	Pencil-tailed tree mouse	29	3.6	acceptable
Rodentia	Brush-tailed rabbit rat	144	4.5	acceptable
Rodentia	Cape short-eared gerbil	54.5	6.1	acceptable
Rodentia	North African gerbil	28.4	7.3	acceptable
Rodentia	Cape gerbil	74.8	5.7	acceptable
Rodentia	Southern savanna gerbil	113	5	acceptable
Rodentia	Lesser Egyptian gerbil	30	5.9	acceptable
Rodentia	Pale gerbil	50	5.5	acceptable
Rodentia	Greater Egyptian gerbil	37	8.2	acceptable
Rodentia	Woodland mouse	60	4.4	acceptable
Rodentia	Golden-bellied water rat	850	7.3	acceptable
Rodentia	Barbary striped grass mouse	26.2	4.4	acceptable
Rodentia	Typical striped grass mouse	42.3	4.8	acceptable
Rodentia	Greater stick-nest rat	332.5	5.3	acceptable
Rodentia	Sundevall's jird	35	5.6	acceptable
Rodentia	Libyan jird	100	5.2	acceptable
Rodentia	Mid-day jird	53	6.8	acceptable
Rodentia	Persian jird	100	6	acceptable
Rodentia	Mongolian jird	53.2	6.3	acceptable
Rodentia	Vinogradov's jird	150	6.7	acceptable
Rodentia	Black-footed tree rat	900	7.8	acceptable
Rodentia	Golden-backed tree rat	268.5	7.1	acceptable
Rodentia	Rock mouse	47.6	4.7	acceptable
Rodentia	Old World harvest mouse	6	3.8	acceptable
Rodentia	Sand-colored rat	70	4	acceptable
Rodentia	Mouse	7.2	4.3	acceptable
Rodentia	House mouse	20.5	4	high
Rodentia	Spinifex hopping mouse	35	6.4	acceptable
Rodentia	Mitchell's hopping mouse	52	5.3	acceptable
Rodentia	Fat-tailed gerbil	40	8.3	acceptable
Rodentia	Slender-tailed cloud rat	1750	13.6	acceptable
Rodentia	Northern Luzon slender-tailed cloud rat	1744	10.7	acceptable
Rodentia	Long-tailed tree mouse	57	3.1	acceptable
Rodentia	Tullberg's rock rat	30	5.2	acceptable
Rodentia	Fat sand rat	212	3.2	acceptable
Rodentia	Australian native mouse	65	7.9	acceptable
Rodentia	Western pebble-mound mouse	12	6.8	acceptable
Rodentia	Smoky mouse	70	6.5	acceptable
Rodentia	Kimberly mouse	12	6.9	acceptable
Rodentia	Heath mouse	64	6	acceptable
Rodentia	Bush rat	130	5.3	acceptable
Rodentia	Australian swamp rat	115	4.4	acceptable
Rodentia	Norway rat	300	3.8	acceptable
Rodentia	Rat	200	4.2	acceptable
Rodentia	Four-striped grass mouse	51	4.5	acceptable
Rodentia	Great gerbil	285	4.5	acceptable
Rodentia	Bushy-tailed jird	65	7.3	acceptable
Rodentia	Indian gerbil	146.7	7	acceptable
Rodentia	Carpentarian rock rat	123	6.2	acceptable
Rodentia	Central rock rat	100	7.5	acceptable
Rodentia	Nutria	7850	8.5	high
Rodentia	Giant rat	1300	7.4	acceptable
Rodentia	Gambian rat	1500	8.4	acceptable
Rodentia	Gray climbing mouse	7.4	4.2	acceptable
Rodentia	Brant's climbing mouse	13	3.3	acceptable
Rodentia	Malagasy giant rat	1250	12.6	acceptable
Rodentia	White-tailed mouse	106	6.3	acceptable
Rodentia	Pouched mouse	47.4	4.5	acceptable
Rodentia	Degu	235	14	acceptable
Rodentia	Coruro	98	10.8	acceptable
Rodentia	Springhare	3500	20	acceptable
Rodentia	Harris's antelope squirrel	126	10.6	acceptable
Rodentia	White-tailed antelope squirrel	105	11.2	acceptable
Rodentia	Gray-bellied squirrel	257	13.7	acceptable
Rodentia	Pallas's squirrel	272	17	acceptable
Rodentia	Plantain squirrel	190	14.8	acceptable
Rodentia	Prevost's squirrel	400	21.1	acceptable
Rodentia	Golden-mantled ground squirrel	157.6	10.4	acceptable
Rodentia	Black-tailed prairie dog	1125	11	high
Rodentia	Thomas's rope squirrel	218	10	acceptable
Rodentia	Fire-footed rope squirrel	271.7	9.5	acceptable
Rodentia	Northern flying squirrel	149	14.2	acceptable
Rodentia	Southern flying squirrel	65.4	19	acceptable
Rodentia	Red-legged sun squirrel	326.5	8.7	acceptable
Rodentia	Thirteen-lined ground squirrel	172.7	7.9	acceptable
Rodentia	Yellow-bellied marmot	3500	21.2	acceptable
Rodentia	Alpine marmot	3500	17.4	acceptable
Rodentia	Woodchuck	4000	14	acceptable
Rodentia	Vancouver marmot	4750	12.1	acceptable
Rodentia	Rock squirrel	663	9.8	acceptable
Rodentia	Red and white giant flying squirrel	1700	21.4	acceptable
Rodentia	Japanese giant flying squirrel	1650	19.2	acceptable
Rodentia	Franklin's ground squirrel	459	7.2	acceptable
Rodentia	Siberian flying squirrel	130	11.4	acceptable
Rodentia	Black giant squirrel	2000	19	acceptable
Rodentia	Indian giant squirrel	2000	20	acceptable
Rodentia	Red-bellied squirrel	600	11.5	acceptable
Rodentia	Eastern gray squirrel	533	23.6	acceptable
Rodentia	Red-tailed squirrel	374	11.5	acceptable
Rodentia	Eastern fox squirrel	800	16	acceptable
Rodentia	Variegated squirrel	485	15.1	acceptable
Rodentia	Eurasian red squirrel	600	14.8	acceptable
Rodentia	European ground squirrel	217	6.7	acceptable
Rodentia	Little ground squirrel	136	7.1	acceptable
Rodentia	Horse-tailed squirrel	312.5	14	acceptable
Rodentia	Low's squirrel	67	11.1	acceptable
Rodentia	Slender squirrel	75	10	acceptable
Rodentia	Cliff chipmunk	62.8	12.6	acceptable
Rodentia	Least chipmunk	44.1	10	acceptable
Rodentia	Siberian chipmunk	85	9.6	acceptable
Rodentia	Eastern chipmunk	96	9.5	acceptable
Rodentia	Townsend's chipmunk	75	9.3	acceptable
Rodentia	Red squirrel	200	9.8	acceptable
Rodentia	Mohave ground squirrel	150	7.8	acceptable
Rodentia	Round-tailed ground squirrel	163.3	8.9	acceptable
Rodentia	Striped ground squirrel	600	10.3	acceptable
Rodentia	South African ground squirrel	588	11.5	acceptable
Rodentia	Lesser bamboo rat	650	4.8	acceptable
Rodentia	Palestine mole rat	160	20.2	acceptable
Rodentia	Greater cane rat	6600	5.4	acceptable
Scandentia	Northern tree shrew	200	11.1	acceptable
Scandentia	Common tree shrew	200	12.4	acceptable
Scandentia	Pygmy tree shrew	58.6	12.2	acceptable
Scandentia	Large tree shrew	197.8	11.6	acceptable
Scandentia	Mindanao tree shrew	350	11.5	acceptable
Sirenia	Dugong	360000	73	acceptable
Sirenia	Amazonian manatee	480000	40	acceptable
Sirenia	West Indian manatee	322000	69	acceptable
Soricomorpha	Hispaniolan solenodon	1000	12.1	acceptable
Soricomorpha	Northern short-tailed shrew	21.6	2.2	acceptable
Soricomorpha	Elliot's short-tailed shrew	14.5	2.8	acceptable
Soricomorpha	Greater red musk shrew	45	2.2	acceptable
Soricomorpha	Bicolored shrew	11	2.9	acceptable
Soricomorpha	White-toothed shrew	11.6	4	acceptable
Soricomorpha	Lesser shrew	7.7	2.8	acceptable
Soricomorpha	Least shrew	4.5	3.5	acceptable
Soricomorpha	Forest shrew	17.5	2.1	acceptable
Soricomorpha	Eurasian water shrew	15	3.1	acceptable
Soricomorpha	Eurasian shrew	9	3.2	acceptable
Soricomorpha	Laxmann's shrew	5.4	3	acceptable
Soricomorpha	Asian house shrew	45.9	3.2	acceptable
Soricomorpha	Star-nosed mole	55.3	2.5	acceptable
Soricomorpha	Japanese mole	97	3.2	acceptable
Tubulidentata	Aardvark	60000	29.8	acceptable
